# Supplementary material for: 3D Multiple Triangular Prisms for Highly Sensitive Non-Contact Mode Triboelectric Bending Sensors
Source: MDPI journal article supplement (doi:10.3390/nano12091499), 2022-04-28
Supplement: s1 [file s1]

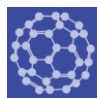

## Supplementary Materials

# 3D Multiple Triangular Prisms for Highly Sensitive Non-Contact Mode Triboelectric Bending Sensors

Gi Hyeon Han <sup>1,2,†</sup>, Sun Woo Kim <sup>1,†</sup>, Jin Kyeom Kim <sup>1</sup>, Seung Hyun Lee <sup>1</sup>, Myeong Hoon Jeong <sup>2</sup>, Hyun Cheol Song <sup>1,3,4</sup>, Kyoung Jin Choi <sup>2</sup> and Jeong Min Baik <sup>1,3,\*</sup>

<sup>1</sup> School of Advanced Materials Science and Engineering, Sungkyunkwan University (SKKU), Suwon 16419, Korea; ghhan@unist.ac.kr (G.H.H.); kimsunwoo0917@gmail.com (S.W.K.); jingyeom0825@naver.com (J.K.K.); samysh@g.skku.edu (S.H.L.); hcsong@kist.re.kr (H.C.S.)

<sup>2</sup> School of Materials Science and Engineering, Ulsan National Institute of Science and Technology (UNIST), Ulsan 44919, Korea; mhjeong0102@unist.ac.kr (M.H.J.); choi@unist.ac.kr (K.J.C.)

<sup>3</sup> KIST-SKKU Carbon-Neutral Research Center, Sungkyunkwan University (SKKU), Suwon 16419, Korea

<sup>4</sup> Center for Electronic Materials, Korea Institute of Science and Technology (KIST), Seoul 02792, Korea

\* Correspondence: jbaik97@skku.edu

† These authors contributed equally to this work.

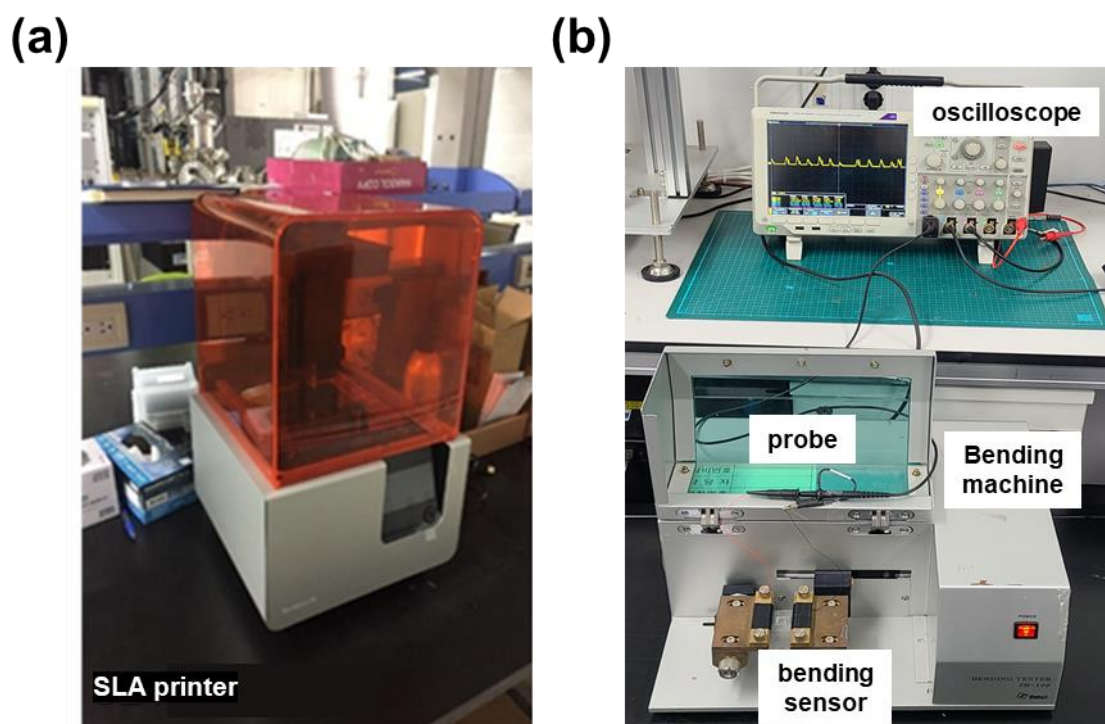

**Figure S1.** Photographs of the SLA 3D printer (a) and electric output signal measurement system (b) with bending motion.

**Table S1.** Parameters of SLA 3D printing.

| 3D printing parameters            | Conditions |
|-----------------------------------|------------|
| Laser spot size ( $\mu\text{m}$ ) | 140        |
| Laser wavelength (nm)             | 405        |
| Laser power (mW)                  | 250        |
| Bed Temp. ( $^{\circ}\text{C}$ )  | 35         |
| Layer height ( $\mu\text{m}$ )    | 100        |

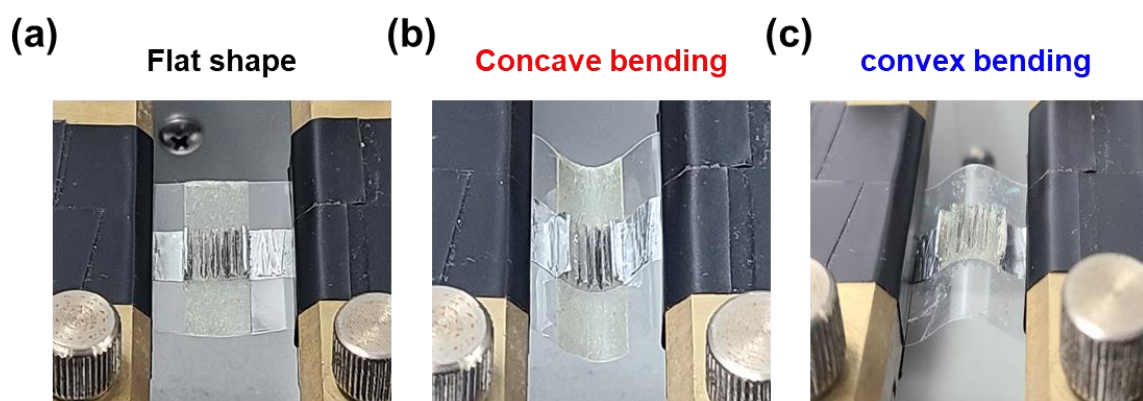**Figure S2.** Photographs of sensors with different bending direction. (a) flat shape without bending, (b) concave bending, (c) convex bending.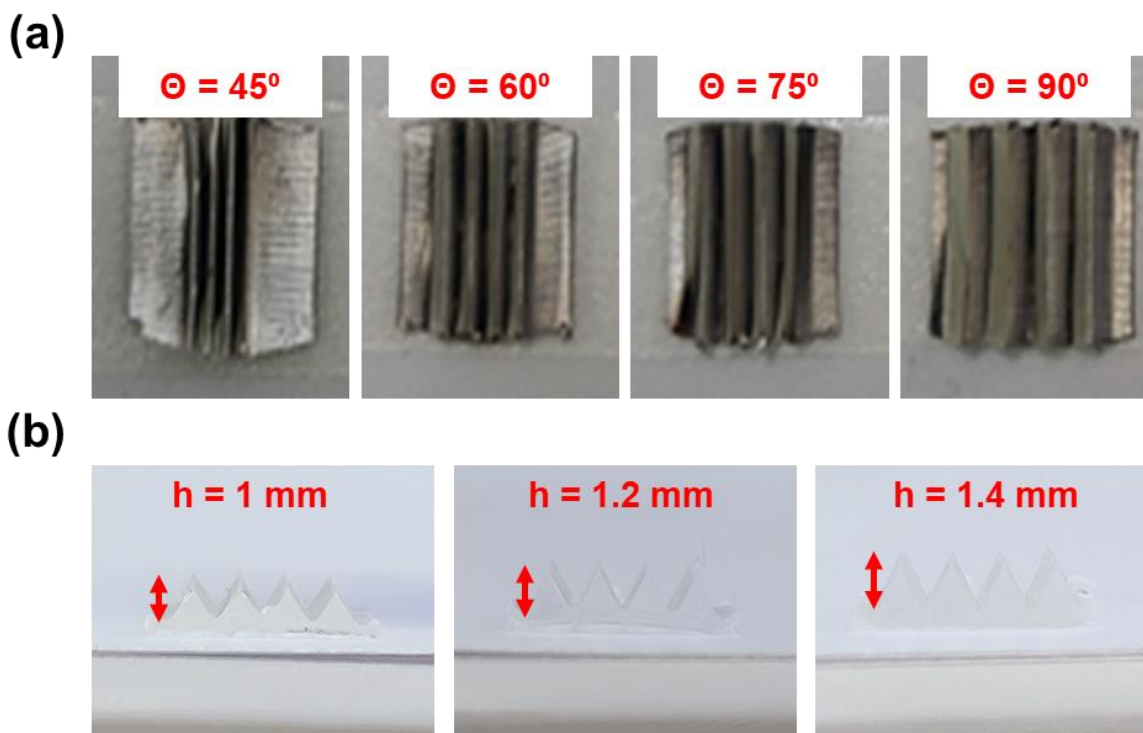**Figure S3.** Photos of the sensors with different angles between triangles (a) and with different heights (b).

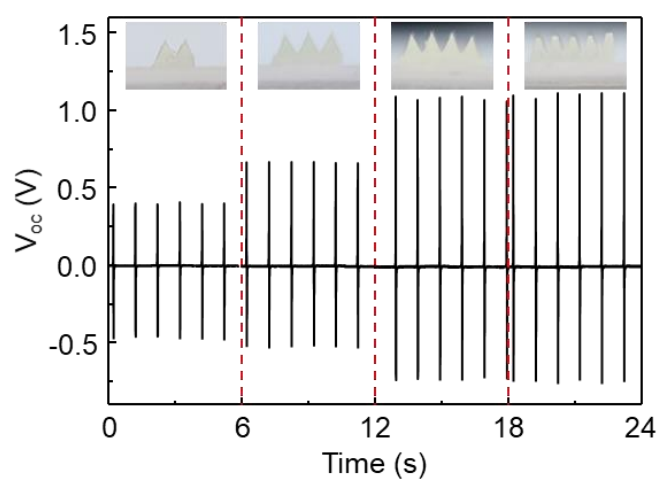

**Figure S4.** Open circuit voltages of the sensor with the number (2, 3, 4, and 5) of the triangular prisms.

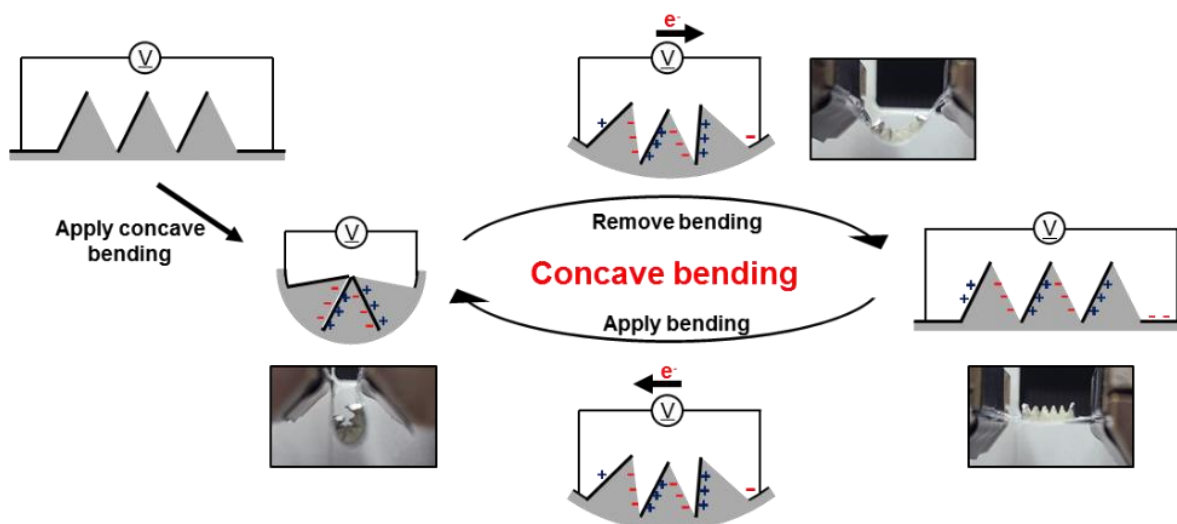

**Figure S5.** Potential generation mechanism of the sensor by concave bending motion.

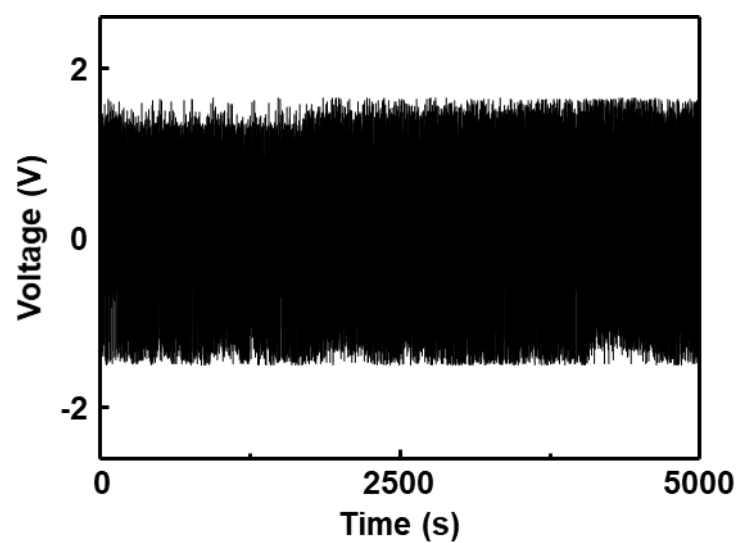

**Figure S6.** The stability and durability test of bending sensor.

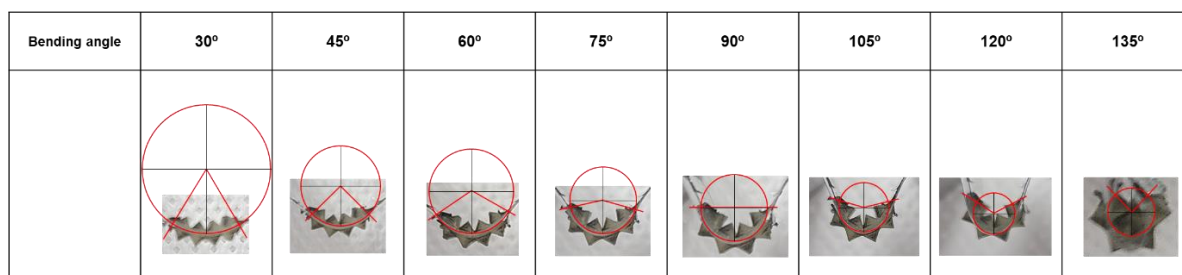

Figure S7. Photograph of sensors with various concave bending from 30° to 135°.

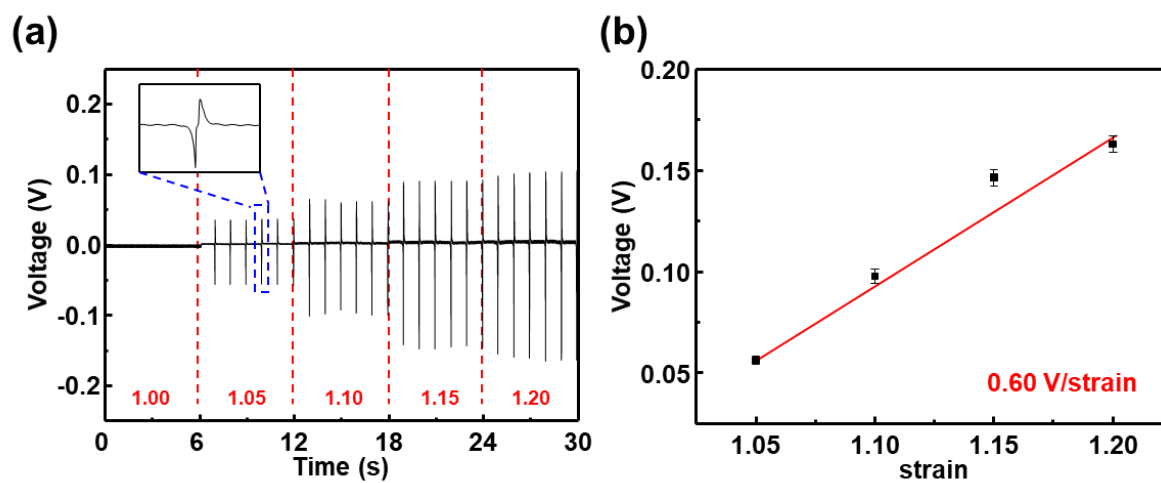

Figure S8. Output voltages of the bending sensor with strain (a) and sensitivity (b).
